# Supplementary material for: A nickel nanoparticle/carbon quantum dot hybrid as an efficient electrocatalyst for hydrogen evolution under alkaline conditions
Source: Royal Society of Chemistry journal article supplement (doi:10.1039/c5ta04867b), 2015-01-01
Supplement: c5ta04867b1.pdf [file c5ta04867b1.pdf]

*Supporting information for*

**Nickel Nanoparticle/Carbon Quantum Dot hybrid as  
Efficient Electrocatalyst for Hydrogen Evolution under  
Alkaline Condition**

*Yanmei Yang, Juan Liu, Sijie Guo, Yang Liu\* and Zhenhui Kang\**

*Jiangsu Key Laboratory for Carbon-Based Functional  
Materials & Devices, Institute of Functional Nano & Soft  
Materials (FUNSOM), Soochow University, 199 Ren'ai Road,  
Suzhou, 215123, Jiangsu, PR China.*

*E-mail: yangl@suda.edu.cn; zhkang@suda.edu.cn*

*Tel: +86 512 65880957*

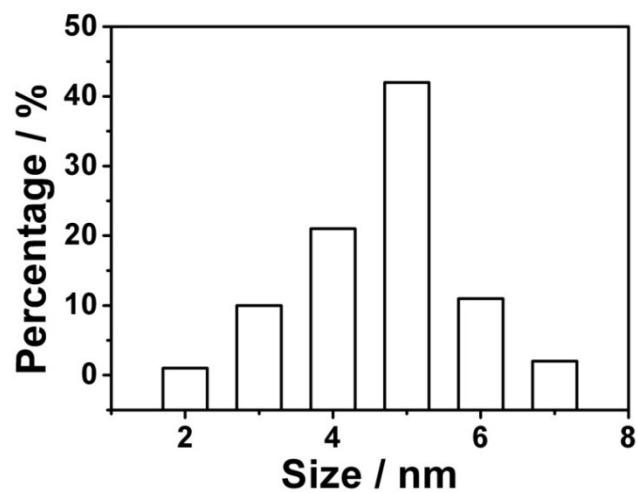

**Figure S1** Size distribution histogram of CQDs.

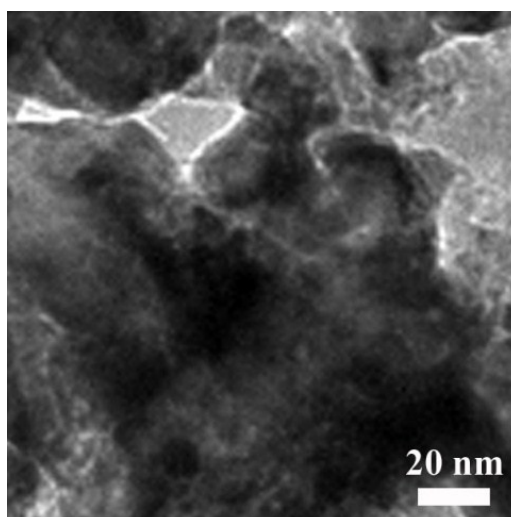

**Figure S2** Typical TEM image of sample prepared from pyrolysis of physical mixture of  $\text{Ni}(\text{OH})_2$  with CQDs.

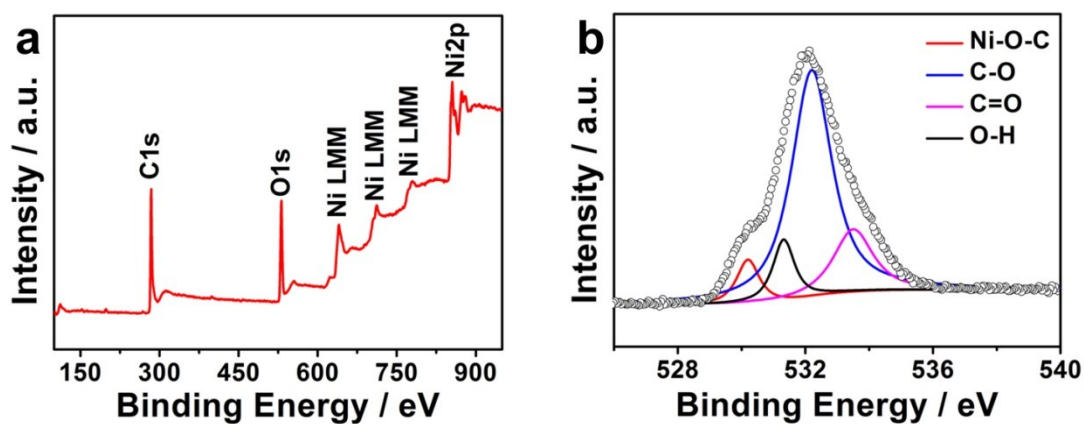

**Figure S3** (a) Full XPS scan and (b) high resolution O1s XPS spectrum of Ni/CQDs.

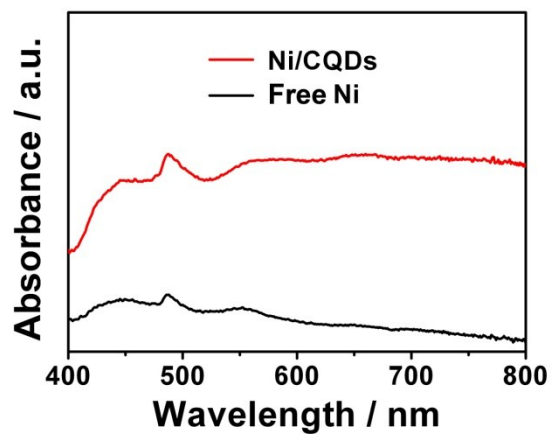

**Figure S4** UV-vis absorption spectra of Ni/CQDs (the red trace) and free Ni (the black trace) catalysts.

**Table S1** The exchange current density of Ni/CQDs, free Ni, and CQDs.

| Samples                                | CQDs   | Free Ni | Ni/CQDs |
|----------------------------------------|--------|---------|---------|
| $j_0 / \text{mA} \cdot \text{cm}^{-2}$ | 0.0006 | 0.0262  | 0.4467  |

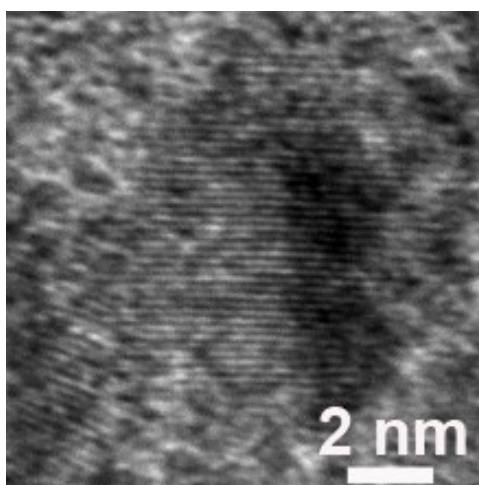

**Figure S5** HRTEM image of Ni/CQDs after 1000 cycle's reaction.

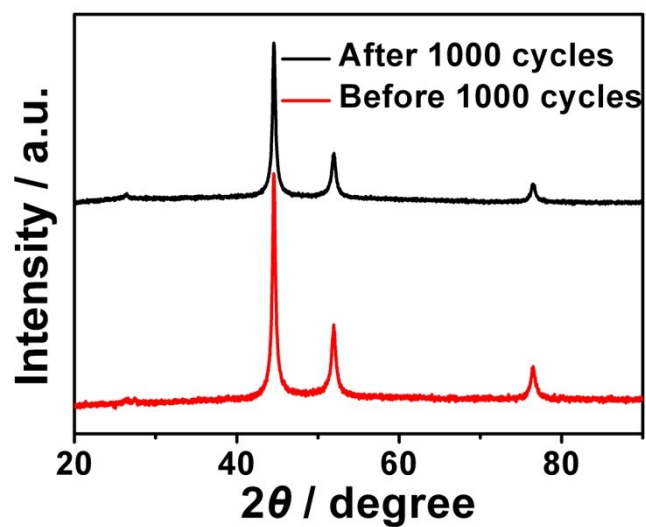

**Figure S6** XRD spectra of Ni/CQDs before and after 1000 cycle's reaction.

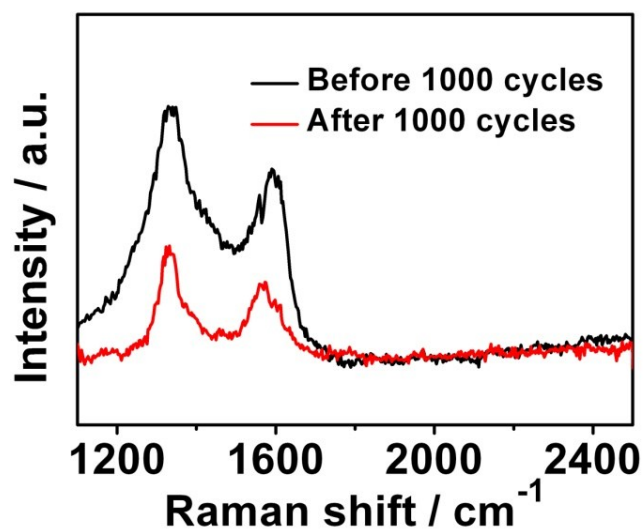

**Figure S7** Raman spectra of Ni/CQDs before and after 1000 cycle's reaction.

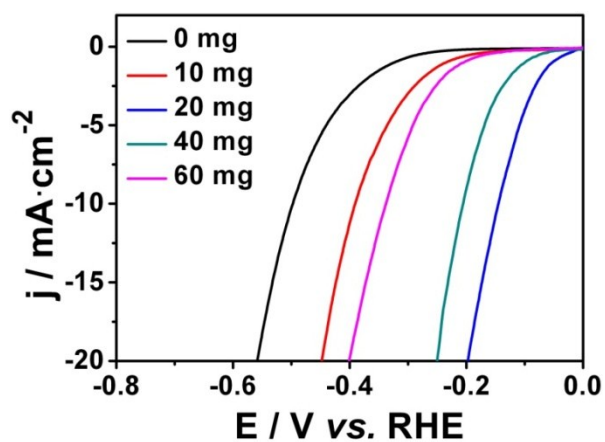

**Figure S8** Polarization curves of HER on Ni/CQDs with various CQDs amounts: 0 mg, 10 mg, 20 mg, 40 mg, and 60 mg.

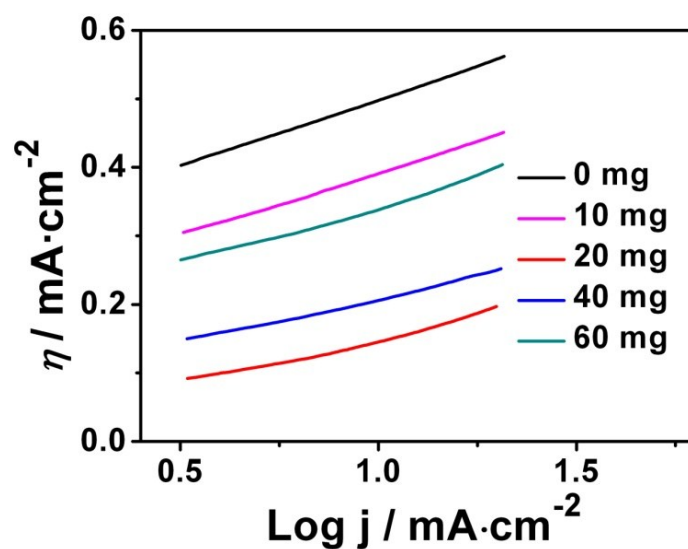

**Figure S9** Tafel plots for the HER on Ni/CQDs with various CQDs amounts: 0 mg, 10 mg, 20 mg, 40 mg, and 60 mg.

**Table S2** The exchange current density of Ni/CQDs prepared with various CQDs amounts.<sup>a</sup>

| CQDs amount / mg                     | 0      | 10     | 20     | 40     | 60     |
|--------------------------------------|--------|--------|--------|--------|--------|
| $j_0 / \text{mA}\cdot\text{cm}^{-2}$ | 0.0262 | 0.0711 | 0.4467 | 0.1570 | 0.0556 |

<sup>a</sup>All samples were prepared by pyrolysis at 500 °C.

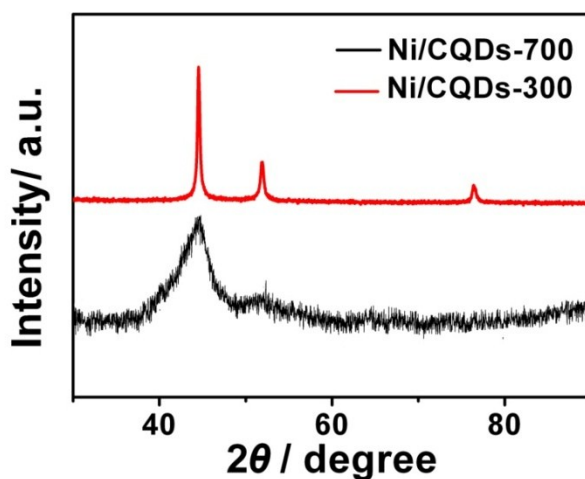

**Figure S10** XRD spectra of Ni/CQDs-300 and Ni/CQDs-700.

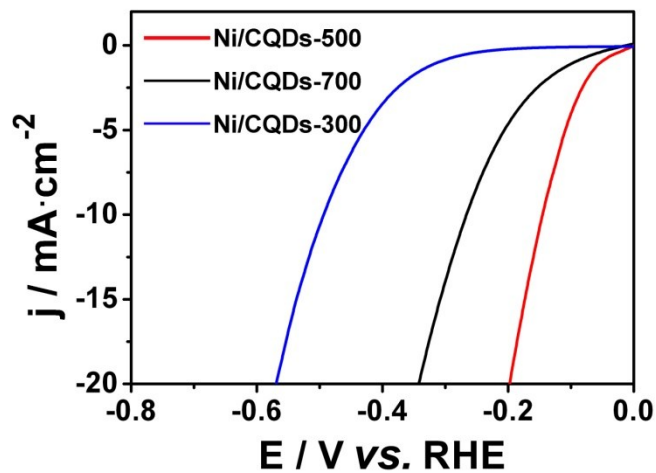

**Figure S11** Polarization curves of HER on Ni/CQDs-300, Ni/CQDs-500, and Ni/CQDs-700.

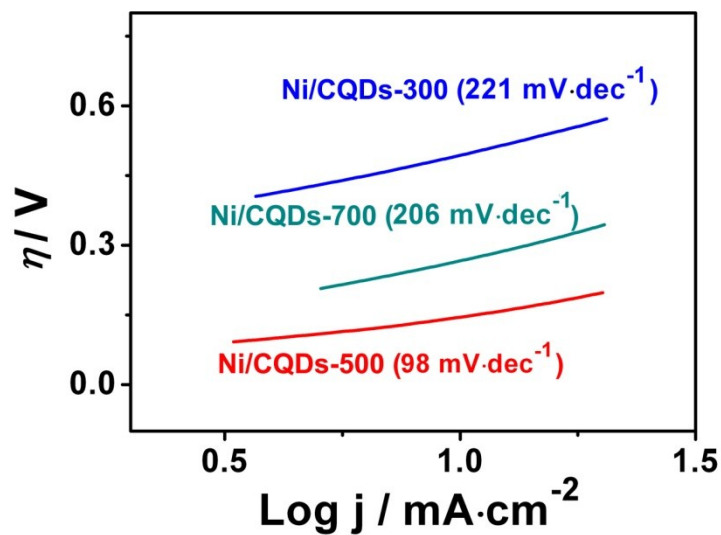

**Figure S12** Tafel plots for the HER on Ni/CQDs-300, Ni/CQDs-500, and Ni/CQDs-700.

**Table S3** The exchange current density of Ni/CQDs prepared at various temperatures.<sup>a</sup>

| Temperature / °C                     | 300    | 500    | 700    |
|--------------------------------------|--------|--------|--------|
| $j_0 / \text{mA}\cdot\text{cm}^{-2}$ | 0.0711 | 0.4467 | 0.3858 |

<sup>a</sup>All samples were prepared from 20 mg CQDs.

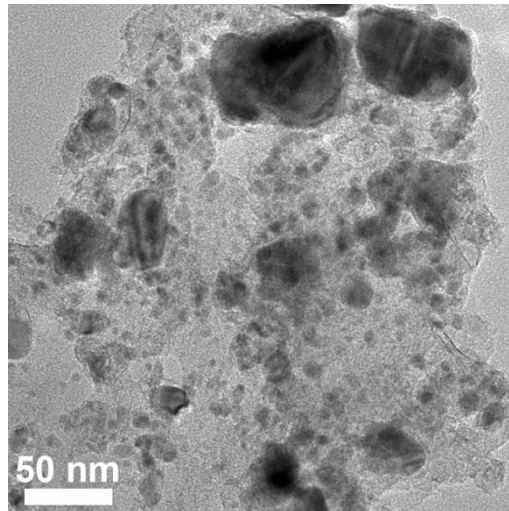

**Figure S13** Typical TEM image of Ni/CQDs-700.

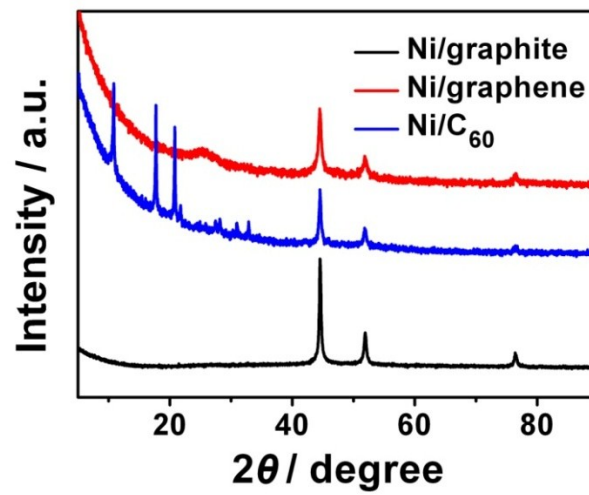

**Figure S14** XRD spectra of Ni/C<sub>60</sub>, Ni/grapheme, and Ni/graphite.

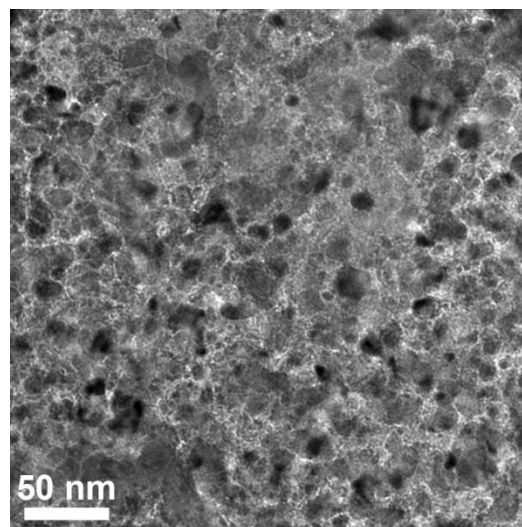

**Figure S15** Typical TEM images of Ni/C<sub>60</sub>, which was prepared from 20 mg C<sub>60</sub>.

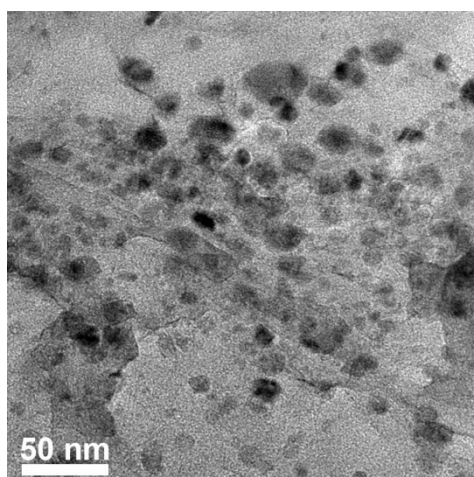

**Figure S16** Typical TEM images of Ni/graphene, which was prepared from 20 mg graphene.

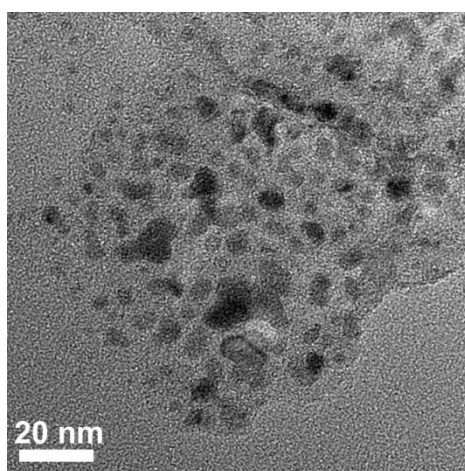

**Figure S17** Typical TEM images of Ni/graphite, which was prepared from 20 mg graphite.

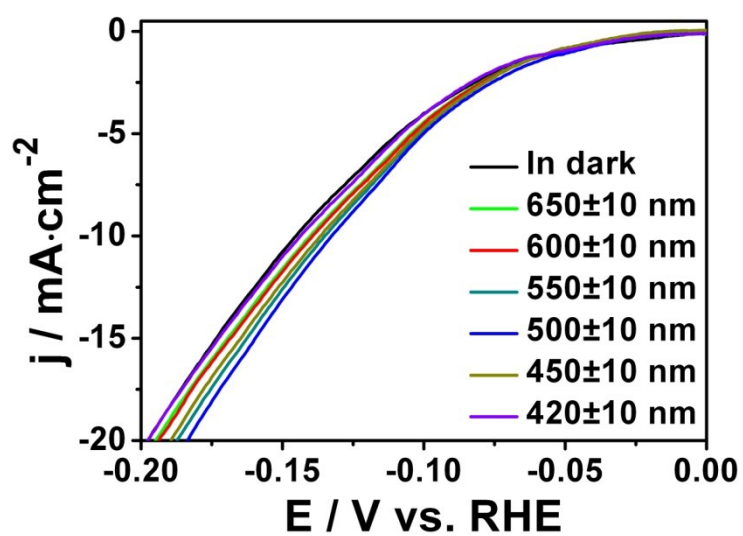

**Figure S18** Polarization curves of HER on Ni/CQDs modified electrode illuminated under various wavelengths.
